# Supplementary material
Source: PubMed Central journal article supplement (PMC2984536)

# Supplementary Data 1

(A) *Arnt*<sup>fx/fx</sup>(DMSO)

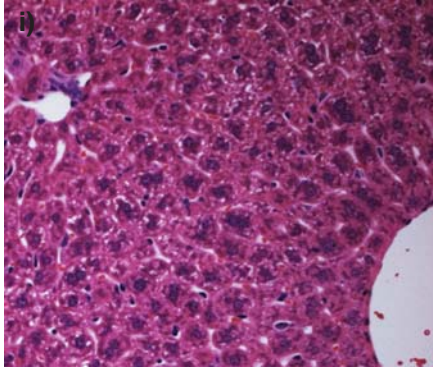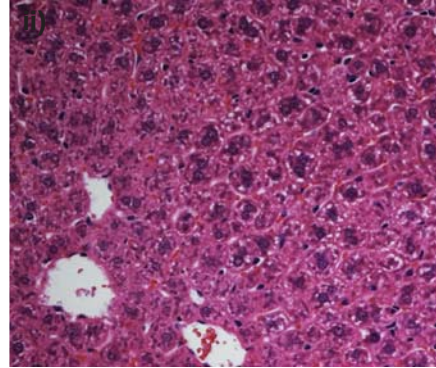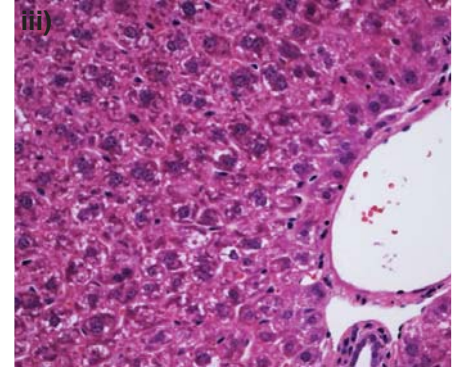

(B) *Arnt*<sup>fx/fx</sup>(Dioxin)

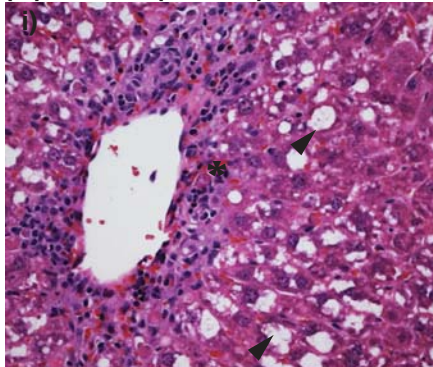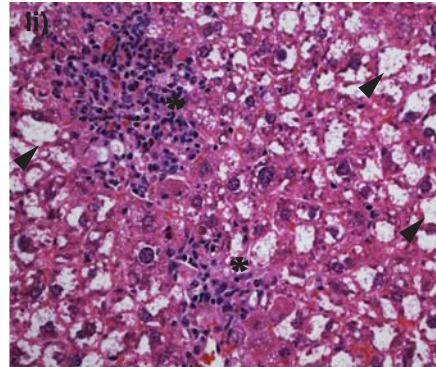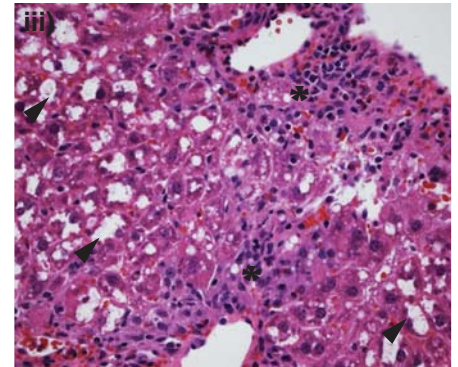

(C) *Arnt*<sup>fx/fx</sup>*Cre*<sup>alb</sup>(DMSO)

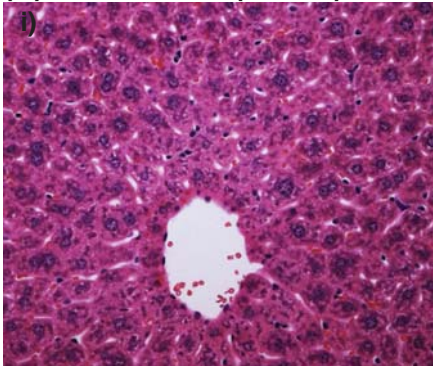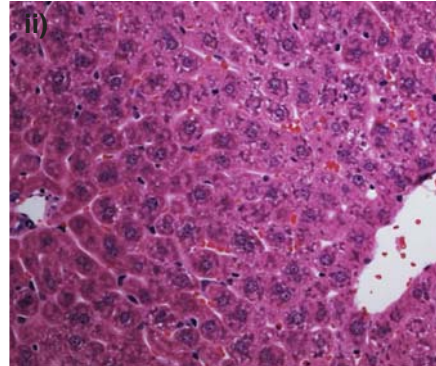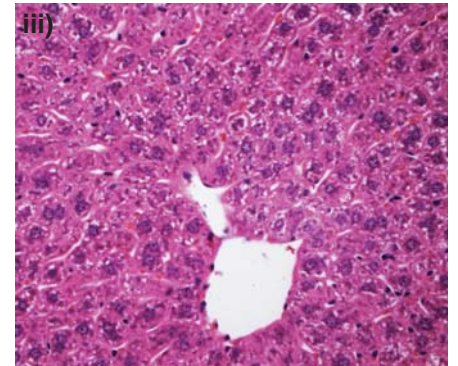

(D) *Arnt*<sup>fx/fx</sup>*Cre*<sup>alb</sup>(Dioxin)

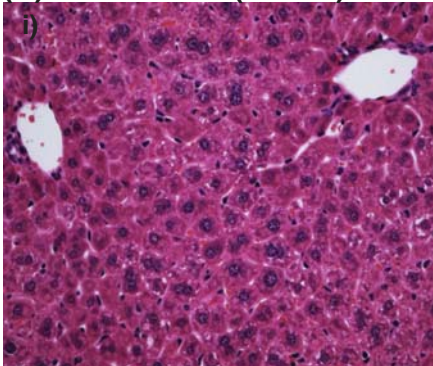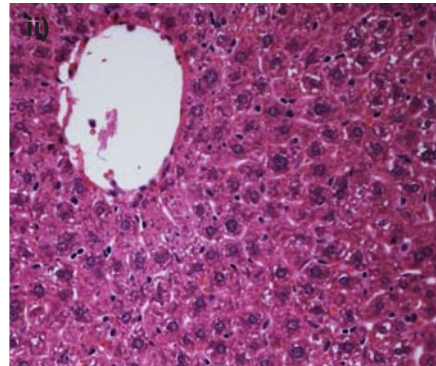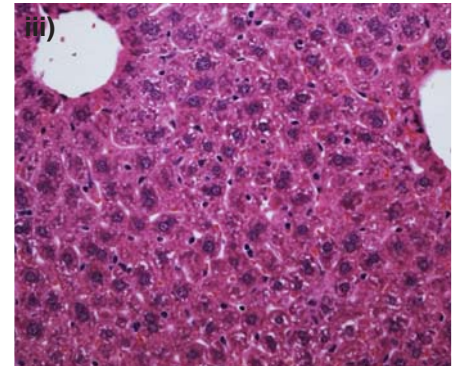



## Supplementary Data 2

### (A) *Arnt*<sup>fx/fx</sup>(DMSO)

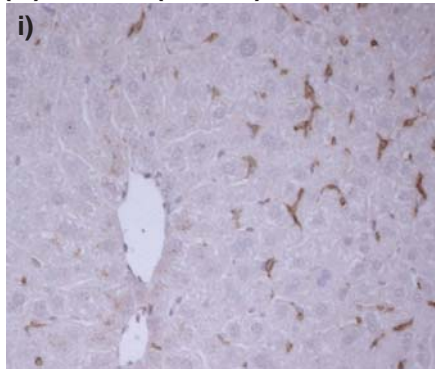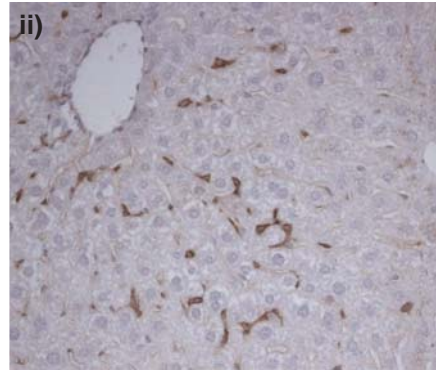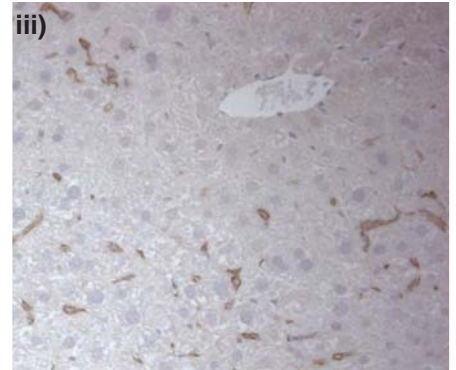

### (B) *Arnt*<sup>fx/fx</sup>(Dioxin)

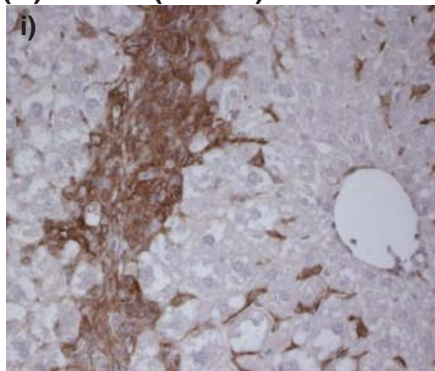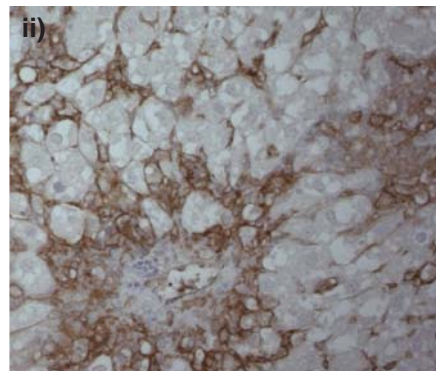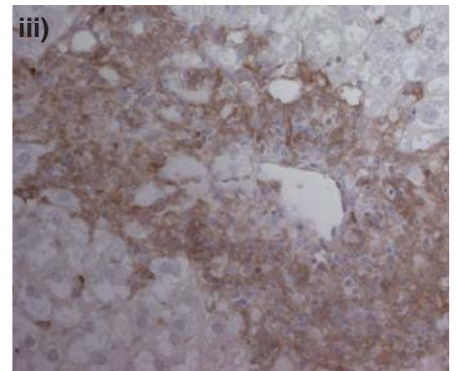

### (C) *Arnt*<sup>fx/fx</sup>*Cre*<sup>alb</sup>(DMSO)

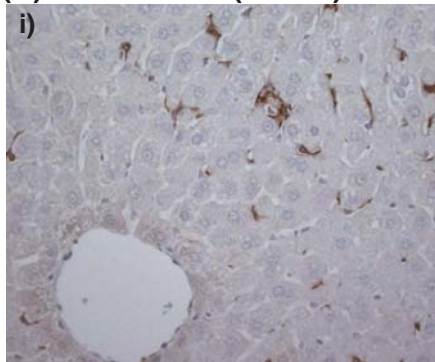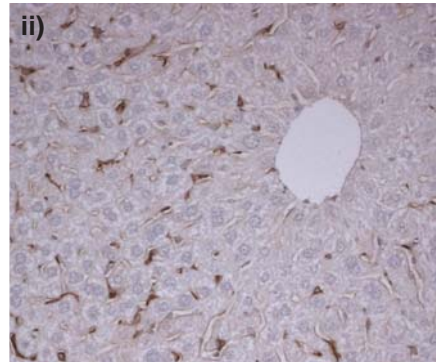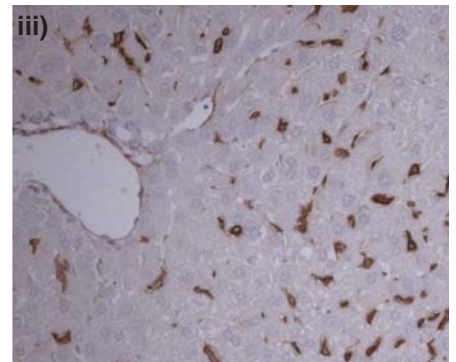

### (D) *Arnt*<sup>fx/fx</sup>*Cre*<sup>alb</sup>(Dioxin)

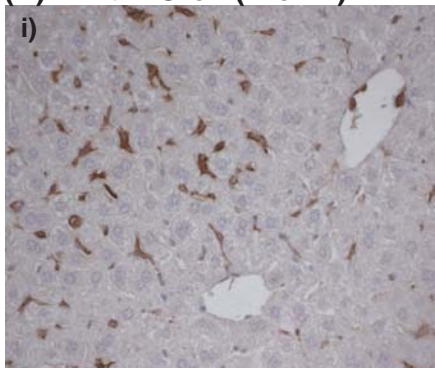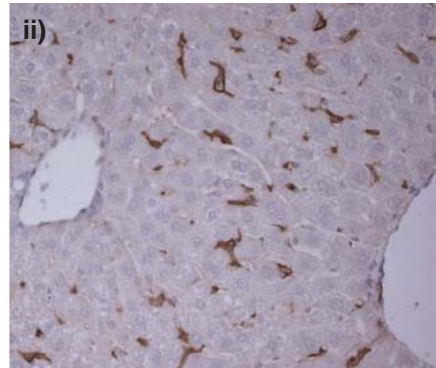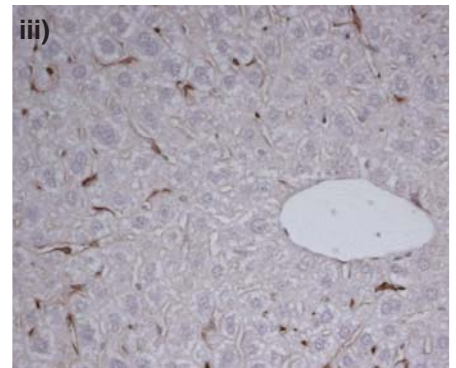



# Supplementary Data 3

(A) *Arnt<sup>fx/fx</sup>*(DMSO)

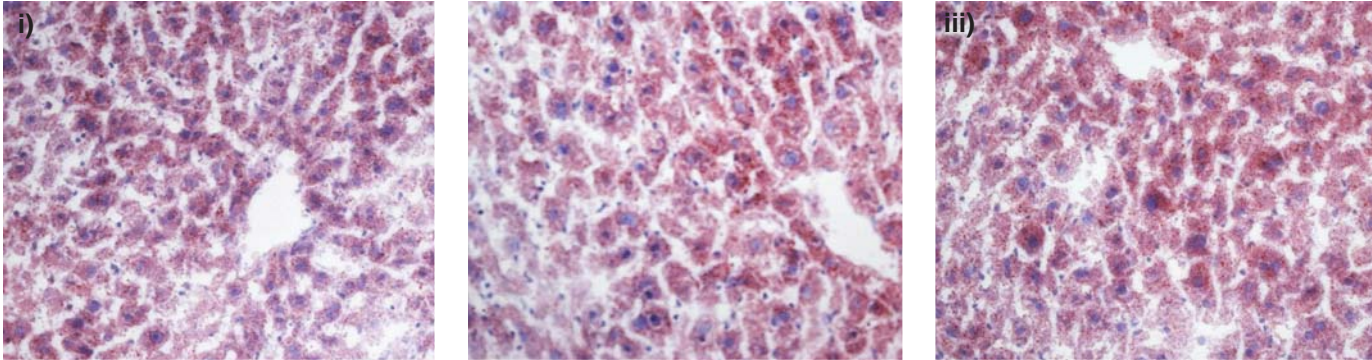

(B) *Arnt<sup>fx/fx</sup>*(Dioxin)

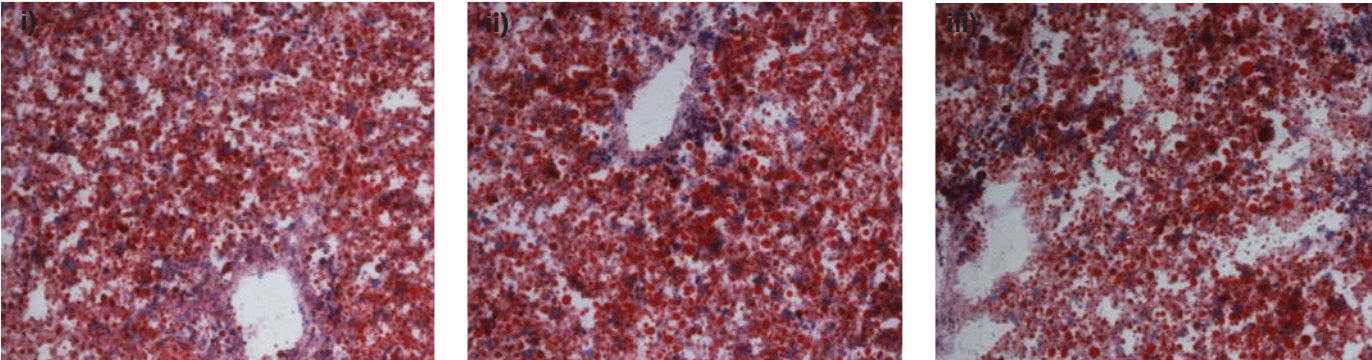

(C) *Arnt<sup>fx/fx</sup>Cre<sup>alb</sup>*(DMSO)

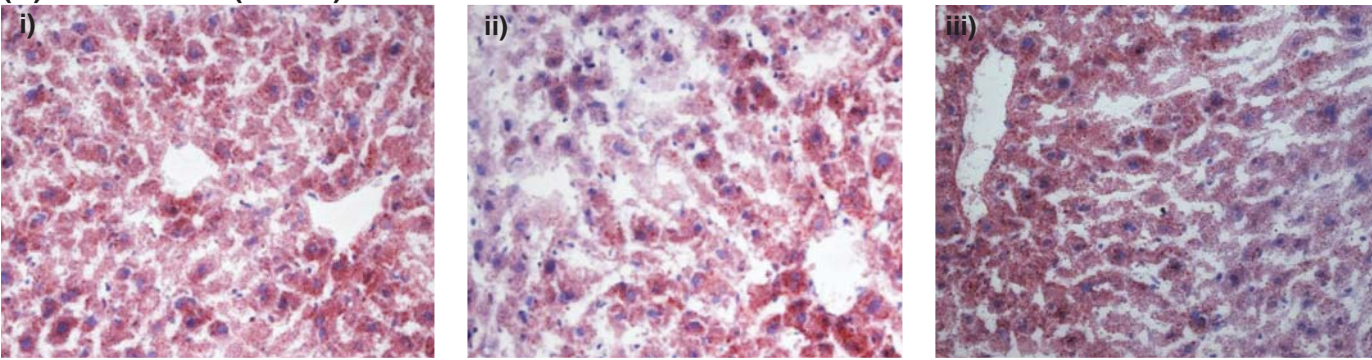

(D) *Arnt<sup>fx/fx</sup>Cre<sup>alb</sup>*(Dioxin)

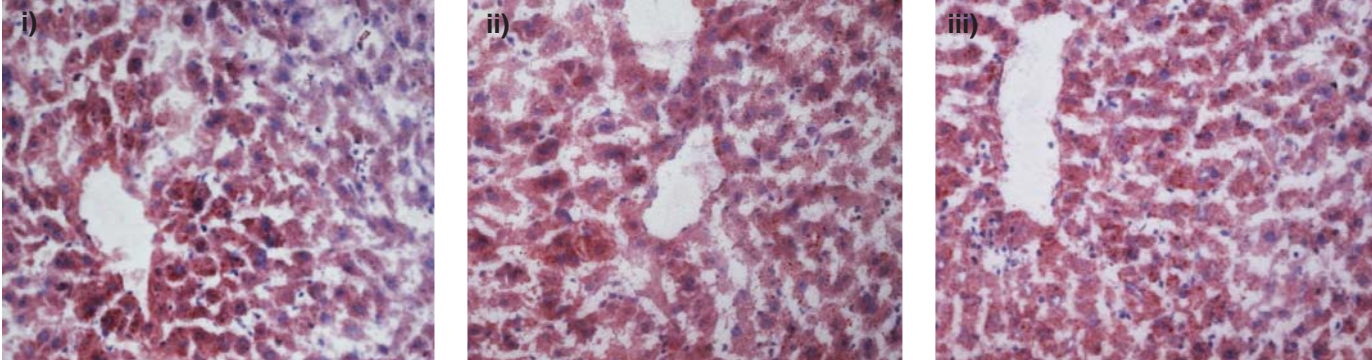

Supplement: supp_kfq305_toxsci-10-0679-File005.pdf [file supp_kfq305_toxsci-10-0679-File005.pdf]
